1 **Comparison of Two Illumina Whole Transcriptome RNA Sequencing Library Preparation Methods**  
2 **Using Human FFPE Specimens**

3

4 Danyi Wang<sup>1¶</sup>, P. Alexander Rolfe<sup>2¶</sup>, Dorothee Foernzler<sup>1</sup>, Dennis O'Rourke<sup>1</sup>, Sheng Zhao<sup>3</sup> Juergen  
5 Scheuenpflug<sup>4</sup>, and Zheng Feng<sup>1\*</sup>

6

7 <sup>1</sup> Global Clinical Biomarkers and Companion Diagnostics, Translational Medicine, Global Development,  
8 EMD Serono Research and Development Institute, Billerica, MA

9 <sup>2</sup> Immunology and Immuno-Oncology Bioinformatics, Translational Medicine, Global Development, EMD  
10 Serono Research and Development Institute, Billerica, MA

11 <sup>3</sup> Oncology Bioinformatics, Translational Medicine, Global Development, Merck KGaA, Darmstadt,  
12 Germany

13 <sup>4</sup> Global Clinical Biomarkers and Companion Diagnostics, Translational Medicine, Global Development,  
14 Merck KGaA, Darmstadt, Germany

15

16

17

18

19

20 ¶ These authors contributed equally to this work.

21

22 \* Corresponding author

23 Email: [Zheng.Feng@emdserono.com](mailto:Zheng.Feng@emdserono.com) (ZF)

24

25

## 26 **Abstract**

27 RNA extraction and library preparation from formalin-fixed, paraffin-embedded (FFPE) samples are crucial  
28 pre-analytical steps towards achieving optimal downstream RNA Sequencing (RNASeq) results. We  
29 assessed the Illumina TruSeq Stranded Total RNA library preparation method and the Illumina TruSeq RNA  
30 Access library preparation method for RNA-Seq analysis using 25 FFPE samples from human cancer  
31 indications (NSCLC, CRC, RC, BC and HCC) at two independent vendors. These FFPE samples covered a  
32 wide range of sample storage durations (3-25 years-old), sample qualities, and specimen types (resection  
33 vs. core needle biopsy). Our data showed that TruSeq RNA Access libraries yield over 80% exonic reads  
34 across different quality samples, indicating higher selectivity of the exome pull down by the capture  
35 approach compared to the random priming of the TruSeq Stranded Total kit. The overall QC data for FFPE  
36 RNA extraction, library preparation, and sequencing generated by the two vendors are comparable, and  
37 downstream gene expression quantification results show high concordance as well. With the TruSeq  
38 Stranded Total kit, the average Spearman correlation between vendors was 0.87 and the average Pearson  
39 correlation was 0.76. With the TruSeq RNA Access kit, the average Spearman correlation between  
40 vendors was 0.89 and the average Pearson correlation was 0.73. Interestingly, examination of the cross-  
41 vendor correlations compared to various common QC statistics suggested that library concentration is  
42 better correlated with consistency between vendors than is the RNA quantity. Our analyses provide  
43 evidence to guide selection of sequencing methods for FFPE samples in which the sample quality may be  
44 severely compromised.

45

## 46 Introduction

47 High analytical sensitivity and broad dynamic range render RNA sequencing (RNA-Seq) very appealing  
48 for mRNA expression analyses in clinical biomarker development and identification for enabling  
49 precision oncology [1]. However, the reliability and accuracy of RNA-Seq data is largely dependent on  
50 template RNA quality and input amount as well as the cDNA library preparation methods applied,  
51 especially in samples with suboptimal quality that is extracted from FFPE specimens [2]. Several next  
52 generation sequencing (NGS) protocols are currently available for the profiling of suboptimal RNA  
53 samples, including RNase H, Ribo-Zero, DSN-lite, NuGEN, SMART, and exome capture, each with its own  
54 strengths and weakness [3-5].

55         Among these NGS protocols, Illumina offers two library preparation methods for samples with  
56 suboptimal quality: the TruSeq RNA Access library preparation method is based on RNA capture by  
57 targeting known exons with exon capture probes to enrich for coding RNAs [4]; the TruSeq Stranded  
58 Total RNA library kit with Ribo-Zero rRNA removal (TruSeq Stranded Total RNA) is a method that reduces  
59 the highly abundant ribosomal RNAs from total RNA samples using ribosomal capture probes [3]. The  
60 performance of the TruSeq Stranded Total RNA and TruSeq RNA Access library preparation kits has been  
61 evaluated on well-established human reference RNA samples from the Microarray/Sequencing Quality  
62 Control consortium (MAQC/SEQC) [6]. The RNA Access protocol is not only suitable for the profiling of  
63 samples of severely compromised quality, but also appropriate for very heterogeneous RNA samples  
64 including a wider range of low quantity and extremely low-quality samples [7]. It is essential to conduct  
65 a systemic comparison of these protocols using human samples across various cancer indications using  
66 different vendors to ensure clinical translatability.

67         In this study, we compared the performance of the Illumina TruSeq Stranded Total RNA and  
68 Illumina TruSeq RNA Access library preparation kits using 25 FFPE samples from patients with five

69 cancers of various sample quality, age of samples, and sample type and between two vendors (Vendor A  
70 and Vendor B).

71

## 72 **Materials and Methods**

### 73 **Clinical samples**

74 Twenty-five FFPE samples from five indications (non-small cell lung cancer (NSCLC), colorectal cancer  
75 (CRC), renal carcinoma (RC), breast cancer (BC) and hepatocellular carcinoma (HCC)) of various sample  
76 quality, ages of samples (collection year: 1993-2015) and sample type (22 resection vs. 3 core needle  
77 biopsy) were procured from three suppliers. The same set of samples were processed using the same  
78 protocols from RNA extraction to sequencing and were evaluated using both TruSeq Stranded Total RNA  
79 and TruSeq RNA Access library preparation kits at two different vendors (Vendor A and Vendor B).

### 80 **RNA extraction and assessment of quality**

81 The RNA extraction of FFPE tumor specimens was performed on five 5µm-deep tissue cuts using the  
82 Qiagen RNeasy Mini Kit (Qiagen), according to the manufacturer's recommendations. Total RNA  
83 concentration was measured using Qubit® RNA HS Assay Kit on a Qubit® 2.0 Fluorometer (Thermo Fisher  
84 Scientific Inc., Waltham, MA, USA). Integrity was assessed using Agilent RNA 6000 Nano Kit on a 2100  
85 Bioanalyzer instrument (Agilent Technologies, Santa Clara, CA, USA). The RIN score and the percentages  
86 of fragments larger than 200 nucleotides ( $DV_{200}$ ) were calculated. According to Agilent 2100 bioanalyzer  
87 system assessment and Illumina library preparation input recommendation, the degraded RNA  
88 samples can be classified according to their size distribution  $DV_{200}$ . FFPE RNA samples with  $DV_{200} >70\%$   
89 are high quality samples, 50-70% are medium quality samples, 30-50% is defined as low quality FFPE  
90 while  $DV_{200} <30\%$  indicates the FFPE RNA is likely too degraded for RNASeq.

91

## 92 **RNA library construction and sequencing**

93 Ribosomal RNA depleted strand-specific RNA libraries were generated with the TruSeq Stranded Total  
94 RNA sample preparation kit with Ribo-Zero Gold (#RS-122-2301 and #RS-122-2302, Illumina) and  
95 transcriptome capture based libraries were generated with the TruSeq RNA Access Library Prep Kit (#RS-  
96 301-2001, Illumina). All protocols were performed following the manufacturer's instructions. Each  
97 library was sequenced on an Illumina HiSeq 2500 (Illumina, Inc. San Diego, CA, USA) using V3 chemistry,  
98 in paired-end mode with a read length of 2x50bp. Each library was normalized to 20 pM and subjected  
99 to cluster and pair read sequencing was performed for 50 cycles on a HiSeq2500 instrument, according  
100 to the manufacturer's instructions. Image analysis, base calling and base quality scoring of the run were  
101 processed on the HiSeq instrument by Real Time Analysis (RTA 1.17.21.3) and followed by generation of  
102 FASTQ sequence files by CASAVA 1.8 (Illumina, Inc. San Diego, CA, USA). Data are available in the  
103 repository [NCBI](#) Sequence Read Archive, accession number PRJNA660476.

104

## 105 **Data Processing**

106 All raw data of the samples were processed through a standard RNASeq pipeline to produce counts and  
107 transcripts per million (TPM) for each gene in each sample. Reads were aligned with STAR version  
108 2.5.2b [8] against hg19 and the gencode gene annotations version 24 [9]. RSEM version 1.2.29 was  
109 then used to quantify and compute TPMs [10]. All downstream processing of the TPM and counts was  
110 performed in R version 3.6.1 [11]. QC was performed on the STAR output using Picard  
111 (<http://broadinstitute.github.io/picard>). Unless otherwise noted, we present output only using the  
112 fifteen samples which passed QC for all four attempts (two vendors times two protocols). We quantified  
113 data quality for a sample in terms of the number of genes detected (count greater than zero) and by the  
114 90<sup>th</sup> percentile count in a sample (low RNA input often yields extremely high amplification of a few

115 highly expressed genes and few reads at the vast majority of genes, leading to a low 90<sup>th</sup> percentile  
116 count). We assessed the results in terms of spearman and pearson correlation of TPM values between  
117 vendors for the same kit, and between the two kits at the same vendor. Spearman correlation measures  
118 whether two sets of values are in the same order, even if the relationship is non-linear, while the  
119 pearson correlation measures whether the relationship between two datasets is linear. For examples, if  
120 the values in one dataset are the square of the values in the other dataset, they would have a high  
121 spearman correlation but low pearson correlation.

122

## 123 Results

### 124 RNA and Library QC Measurements

125 To evaluate the performance of RNA-seq methods in profiling FFPE samples, we conducted a technical  
126 assessment of the two different RNA library preparation protocols on 25 FFPE samples (Fig 1).

127

128 **Figure 1. Study design & workflow.** Schematic of the sample flow through the two vendors and two  
129 protocols. The number of samples processed at each step is noted.

130

131 The samples were first sent to vendor A. There, 25 FFPE samples were extracted and analyzed for RNA  
132 integrity and quality. A total of 23 FFPE specimens had sufficient yield (>100ng, average DV<sub>200</sub> is 28%  
133 with the range from 5% to 51%) to proceed to TruSeq Stranded Total RNA library preparation. Four  
134 sample libraries had a final concentration of less 2nM and therefore did not proceed to sequencing. A  
135 total of 19 libraries had sufficient yield to proceed to sequencing. All sequenced samples generated  
136 adequate reads (100M or greater). Since more RNA sample is required in the TruSeq Stranded Total  
137 RNA protocol, only 21 samples had sufficient RNA remaining (total yield > 20ng, average DV<sub>200</sub> is 27 with

138 the range from 5 to 51) for the TruSeq RNA Access library preparation kit. Two Access library failed  
 139 library QC and then 19 samples were sequenced.

140 Due to insufficient FFPE slides for three samples, Vendor B performed RNA extraction on the 22  
 141 remaining FFPE samples. All extracted RNA passed extraction QC (total yield >100 ng, average DV<sub>200</sub> is  
 142 44% with the range from 12% to 72%) to proceed to TruSeq Stranded Total RNA library preparation. All  
 143 22 samples had sufficient yield and proceeded to sequencing. The remaining 20 RNA samples (total  
 144 yield >20ng, average DV<sub>200</sub> is 44% with the range from 12% to 72%) were re-prepared using the Illumina  
 145 TruSeq RNA Access library kit and 16 samples passed the library QC for sequencing. Fifteen samples  
 146 were available from both vendors and both kits and were thus used for further analysis.

147 For each vendor and kit, Table 1 shows the mean (and range or standard deviation) for process  
 148 QC measures. The library preparation output is characterized by the average fragment size (measured  
 149 by Bioanalyzer) and the library concentration. The sequencing output is characterized by the number of  
 150 reads and a variety of metrics concerning the read alignment rates to exons and ribosomal regions. S1  
 151 Table shows the sample annotations and pre-sequencing QC results for each sample.

152

153 **Table 1.** Illumina TruSeq RNA Access versus TruSeq Stranded Total RNA: Overall QC and Alignment Stats.

| Step         | QC measure                                | Vendor A              |                      | Vendor B               |                        |
|--------------|-------------------------------------------|-----------------------|----------------------|------------------------|------------------------|
|              |                                           | Total Stranded (n=15) | RNA Access (n=15)    | Total Stranded (n =15) | RNA Access (n =15)     |
| Library Prep | Average Fragment size: Average (Range)    | 318 (260-413)         | 309.83 (280-326)     | 296.63 (268-324)       | 324.5 (280-394)        |
|              | Concentration (nM): Average (Range)       | 57.43 (18.68-108.81)  | 51.24 (3.89- 150.63) | 224.57 (6.51 - 507.85) | 205.81 (9.76 - 600.62) |
| Sequencing   | Total paired end reads: Average (Range)   | 137M (117-157)        | 141M (104-169)       | 64.7 M (22.5-191)      | 184M (114-294)         |
|              | %Aligned reads rate: Average ± SD         | 89.6 ± 10.8           | 95.2 ± 1.0           | 86.3 ± 7.8             | 92.7 ± 1.5             |
|              | %Exonic rate: Average ± SD                | 18.5 ± 4.7            | 81.0 ± 2.3           | 41.6 ± 13.2            | 84 ± 2.4               |
|              | %Intragenic rate: Average ± SD            | 83.1 ± 6.8            | 89.1 ± 2.3           | 81.5 ± 17.6            | 92.1 ± 1.9             |
|              | %rRNA rate: Average ± SD                  | 2.0 ± 1.9             | 2.2 ± 1.6            | 9.9 ± 1.83             | 1.8 ± 2.2              |
|              | % Correct strand reads rate: Average ± SD | 94.1 ± 3.3            | 95.9 ± 2.3           | 97.5 ± 1.3             | 97.8 ± 1.5             |

154

## 155 **Alignment statistics**

156 Our results showed that the TruSeq RNA Access library preparation protocol produced higher alignment  
157 rates at both vendors (means 95% and 93% vs 83% and 78%; Table 1). Compared to the TruSeq Stranded  
158 Total RNA protocol, the TruSeq RNA Access protocol showed marked differences in the percent of reads  
159 aligned to exons, introns, and intergenic regions. For TruSeq RNA Access the percentages of exonic reads  
160 were over 80% across different quality samples at both vendors, reflecting the high efficiency of the  
161 exome pull down by the capture approach. The mean exonic percentages were 81% and 84% with the  
162 TruSeq RNA Access kit and 17% and 31% with the TruSeq Stranded Total kit.

163 S2 Table shows per-sample data, including output from Picard, genes detected ( $\geq 1$  read), and the 90<sup>th</sup>  
164 percentile gene count.

165

## 166 **Agreement between vendors**

167 The two kits showed similar correlation between vendors. With the TruSeq Stranded Total RNA kit, the  
168 average per-sample Spearman correlation between vendors was 0.87 and the average Pearson  
169 correlation was 0.76. With the TruSeq RNA Access kit, the average per-sample Spearman correlation  
170 between vendors was 0.89 and the average Pearson correlation was 0.73. Across individual samples,  
171 the correlation between vendors ranged from  $R=.94$  to  $R=.01$  (Fig 2).

172

173 **Figure 2. Example cross-vendor scatterplots.** The overall correlation between vendors ranged from  
174 excellent (eg, A: FFPE\_1582 in both TruSeq Stranded Total RNA ( $R=0.873$ ,  $\rho=0.927$ ) and TruSeq RNA  
175 Access kit ( $R=0.858$ ,  $\rho=0.927$ )) to moderate (eg, B: FFPE\_1579 in both TruSeq Stranded Total RNA  
176 ( $R=0.012$ ,  $\rho=0.760$ ) and TruSeq RNA Access kit ( $R=0.131$ ,  $\rho=0.869$ )).



177

## 178 **Agreement between protocols**

179 QC data for FFPE RNA extraction, library preparation, and sequencing from both vendors are  
180 comparable. Both vendors achieved similar agreement between protocols. Amongst the 15 samples  
181 available in all four datasets, the average Spearman correlation between protocols at vendor A was 0.81  
182 and at vendor B it was 0.83. The average Pearson correlation was 0.13 at vendor A and 0.22 at vendor  
183 B.

184 While the scatterplots for the individual samples (see S1 Fig for the complete set) make it clear  
185 that the correlation between protocols is generally good, it is difficult to tell whether there is any  
186 systematic difference between protocols. For this, we used Q-Q plots; deviations from a straight line in  
187 these plots suggest systematic differences in the dynamics between the two protocols. A number of  
188 samples show off-diagonal behavior at the upper end of expression, suggesting that either the TruSeq  
189 Stranded Total RNA protocol is saturating or that the TruSeq RNA Access protocol is over-amplifying very  
190 highly expressed genes (Fig 3 for one example; see S3 Fig for full set).

191

192 **Figure 3. Q-Q plots.** The Q-Q plots help visualize the shape of the correlation or distribution between  
193 the two kits. Here, the data for sample FFPE\_766 is shown from both vendors. At both, the majority of  
194 the plot shows a straight diagonal line, indicating identical distribution of TPMs for most percentiles.  
195 However, the highest percentiles diverge from the diagonal and the TruSeq Stranded Total RNA kit  
196 shows higher levels than the TruSeq RNA Access kit. The plot should not be interpreted to mean that  
197 either kit is necessarily correct; only that the highest expressed genes in the TruSeq Stranded Total RNA  
198 kit yield higher TPM values than the highest expressed genes in the TruSeq RNA Access kit. The plots  
199 also show divergence at very low expression values, potentially genes which are not present in the

200 Access probe set and thus generate no signal in the TruSeq RNA Access results while generating some  
201 signal in the TruSeq Stranded Total RNA kit.

202

203 We were interested in whether any QC factors (e.g. RNA input, library concentration), especially  
204 those obtained before sequencing, might predict the correlation between vendors. Such a predictor  
205 could be used in future experiments to distinguish samples likely to produce high quality output from  
206 those which may not. We thus examined the Spearman correlation between QC factors (the RNA  
207 quantity from each vendor and the library concentration from each vendor) and the Spearman  
208 correlation between the data from the two vendors. Table 2 summarizes the results, which suggest that  
209 library concentration is better correlated with consistency between vendors than is the RNA quantity.  
210 For example, for the TruSeq Stranded Total RNA data, the Spearman correlation of Vendor A's library  
211 concentration with the correlation between Vendor A's results and Vendor B's results is 0.96. Fig 4  
212 shows the data in detail, plotting the cross-vendor Spearman correlation vs library concentration.

213

214 **Table 2.** Spearman correlations between library QC factors (total RNA extracted, library concentration)  
215 and the spearman correlation between vendors of the eventual gene-level quantification. This uses  
216 cross-vendor correlation as a proxy for the quality of the result and looks at which QC factors might  
217 predict that result quality.

|                        | TruSeq RNA Access | TruSeq Stranded Total RNA |
|------------------------|-------------------|---------------------------|
| Vendor A $\mu\text{g}$ | 0.421             | 0.264                     |
| Vendor B $\mu\text{g}$ | 0.481             | 0.35                      |
| Vendor A Library Conc  | 0.732             | 0.964                     |
| Vendor B Library Conc  | 0.812             | 0.821                     |

218

219 **Figure 4. Cross-vendor correlation vs library concentration.** Examination of the cross-vendor  
220 correlations compared to various common QC statistics suggested that the library concentration was

221 most informative in predicting the cross-vendor correlation. Plotted here are the cross-vendor  
222 correlation values vs library concentration. For the TruSeq Stranded Total RNA kit, there is a trend of  
223 increasing (though perhaps non-linear) correlation as library concentration increases. For TruSeq RNA  
224 Access, there appears to be notably better results from library concentrations above 50nM.

225

## 226 **Discussion/Conclusions**

227 RNA-seq is a powerful technology in transcriptome profiling. However, the challenge remains to choose  
228 suitable RNA-seq protocols for oncology FFPE specimens with degraded and low quantity RNA sample  
229 material. To guide the experimental design of clinical FFPE sample RNA-Seq, we conducted a comparison  
230 study using two Illumina library preparation protocols at two vendors for analyzing human RNA isolated  
231 from FFPE tissues.

232 Our results showed that both kits have the similar cross-vendor correlations, suggesting that  
233 both protocols offer reproducible results between different operators. However, the two library  
234 preparation kits yielded substantial differences in output consistent with the different approaches that  
235 the two kits take. Since more RNA sample is required in the Total TruSeq Stranded Total RNA protocol,  
236 only 20 samples had remaining RNA for TruSeq RNA Access library preparation. Thus, the TruSeq RNA  
237 Access protocol may be the preferred library prep for samples with limited quantity. The Illumina  
238 TruSeq RNA Access Library kit generated a higher fraction of reads from protein coding regions  
239 compared to other genomic regions; thus, it is a more efficient way to assay the expression of protein  
240 coding genes given a limited sequencing budget.

241 While the TruSeq RNA Access kit may be preferred for difficult samples, the resulting data may  
242 not be completely comparable to data from the TruSeq Stranded Total kit or to other kits based on  
243 ribosomal depletion and random priming. Further, the two library preparation kits yielded different

244 dynamics of the output transcripts-per-million data at high expression levels where the TruSeq Stranded  
245 Total protocol tended to capture genes with higher expression and GC content. The probe-based  
246 selection of TruSeq RNA Access libraries may influence output differently than the random priming in  
247 other kits. Finally, the probe selection approach precludes certain downstream analyses, such as testing  
248 for viral or bacterial content, that may be valuable in some settings. Thus, the lower sequencing costs  
249 should be weighed carefully against the anticipated uses for the data to decide which is appropriate for  
250 a given experiment. However, since the probe selection step in the RNA Access protocol may bias results  
251 compared to other platforms, further exploration may be needed.

252           In our study, two samples, ages 14 years and 16 years, failed RNA extraction QC in Vendor A,  
253 suggesting the influence of age on sample quality on RNAseq library preparation and sequencing. S1  
254 Table lists the detailed reasons for all failures in extraction and library preparation. Interestingly, library  
255 concentration appeared to be the best predictor of reproducibility across vendors and thus may be a  
256 preferred QC metric for future experiments on FFPE material. While this finding may be useful in  
257 avoiding sequencing samples with a low chance of providing quality data, it is not optimal as it can only  
258 be applied after the FFPE material is consumed, RNA extracted, and the work of library preparation is  
259 completed.

260           In summary, the quality and quantity of sequencing data obtained through RNA-Seq were  
261 strongly influenced by the type of the sequencing library kits. Illumina TruSeq RNA Access library  
262 protocol could be a low-cost solution on highly degraded and limited FFPE samples, such as those from  
263 clinical studies in which the FFPE quality is severely compromised.

264

265

266

## 267 **References**

- 268 1. Cieřlik M, Chinnaiyan AM. Cancer transcriptome profiling at the juncture of clinical translation.  
269 Nature reviews Genetics. 2018;19(2):93-109. Epub 2017/12/28. doi: 10.1038/nrg.2017.96. PubMed  
270 PMID: 29279605.
- 271 2. Li J, Fu C, Speed TP, Wang W, Symmans WF. Accurate RNA Sequencing From Formalin-Fixed  
272 Cancer Tissue To Represent High-Quality Transcriptome From Frozen Tissue. JCO Precis Oncol.  
273 2018;2018. Epub 2018/06/05. doi: 10.1200/PO.17.00091. PubMed PMID: 29862382; PubMed Central  
274 PMCID: PMCPMC5976456.
- 275 3. Adiconis X, Borges-Rivera D, Satija R, DeLuca DS, Busby MA, Berlin AM, et al. Comparative  
276 analysis of RNA sequencing methods for degraded or low-input samples. Nature methods.  
277 2013;10(7):623-9. Epub 2013/05/21. doi: 10.1038/nmeth.2483. PubMed PMID: 23685885; PubMed  
278 Central PMCID: PMCPMC3821180.
- 279 4. Cieslik M, Chugh R, Wu YM, Wu M, Brennan C, Lonigro R, et al. The use of exome capture RNA-  
280 seq for highly degraded RNA with application to clinical cancer sequencing. Genome research.  
281 2015;25(9):1372-81. Epub 2015/08/09. doi: 10.1101/gr.189621.115. PubMed PMID: 26253700; PubMed  
282 Central PMCID: PMCPMC4561495.
- 283 5. Park YS, Kim S, Park DG, Kim DH, Yoon KW, Shin W, et al. Comparison of library construction kits  
284 for mRNA sequencing in the Illumina platform. Genes & genomics. 2019;41(10):1233-40. Epub  
285 2019/07/28. doi: 10.1007/s13258-019-00853-3. PubMed PMID: 31350733.
- 286 6. Consortium. SM-I. A comprehensive assessment of RNA-seq accuracy, reproducibility and  
287 information content by the Sequencing Quality Control Consortium. Nature biotechnology.  
288 2014;32(9):903-14. Epub 2014/08/26. doi: 10.1038/nbt.2957. PubMed PMID: 25150838; PubMed  
289 Central PMCID: PMCPMC4321899.

- 290 7. Schuierer S, Carbone W, Knehr J, Petitjean V, Fernandez A, Sultan M, et al. A comprehensive  
291 assessment of RNA-seq protocols for degraded and low-quantity samples. *BMC Genomics*.  
292 2017;18(1):442. Epub 2017/06/07. doi: 10.1186/s12864-017-3827-y. PubMed PMID: 28583074; PubMed  
293 Central PMCID: PMC5460543.
- 294 8. Dobin A, Davis CA, Schlesinger F, Drenkow J, Zaleski C, Jha S, et al. STAR: ultrafast universal RNA-  
295 seq aligner. *Bioinformatics (Oxford, England)*. 2013;29(1):15-21. Epub 2012/10/30. doi:  
296 10.1093/bioinformatics/bts635. PubMed PMID: 23104886; PubMed Central PMCID: PMC3530905.
- 297 9. Frankish A, Diekhans M, Ferreira AM, Johnson R, Jungreis I, Loveland J, et al. GENCODE  
298 reference annotation for the human and mouse genomes. *Nucleic acids research*. 2019;47(D1):D766-  
299 d73. Epub 2018/10/26. doi: 10.1093/nar/gky955. PubMed PMID: 30357393; PubMed Central PMCID:  
300 PMC6323946.
- 301 10. Li B, Dewey CN. RSEM: accurate transcript quantification from RNA-Seq data with or without a  
302 reference genome. *BMC bioinformatics*. 2011;12:323. Epub 2011/08/06. doi: 10.1186/1471-2105-12-  
303 323. PubMed PMID: 21816040; PubMed Central PMCID: PMC3163565.
- 304 11. R: RCT. A Language and Environment for Statistical Computing. R Foundation for Statistical  
305 Computing, Vienna. <https://www.R-project.org>.  
306  
307

## 308 **Acknowledgement**

309 The authors would like express gratitude to Alice Huang for her great support on the conceptualization  
310 and reviewing the manuscript. The authors also would like express gratitude to Stefan Pinkert for his  
311 great support on sequencing data QC.

## 312 **Funding**

313 This project was supported by the EMD Serono, Merck KGaA, Darmstadt, Germany

314

## 315 **Supporting information**

316 **S1 Table:** Sample characteristics and data from pre-analysis QC (eg, RNA extraction, library preparation).

317 **S2 Table:** Post-analysis QC output.

318 **S1 Fig:** Complete set of cross-vendor scatterplots

319 **S2 Fig:** Full set of Q-Q plots.

320

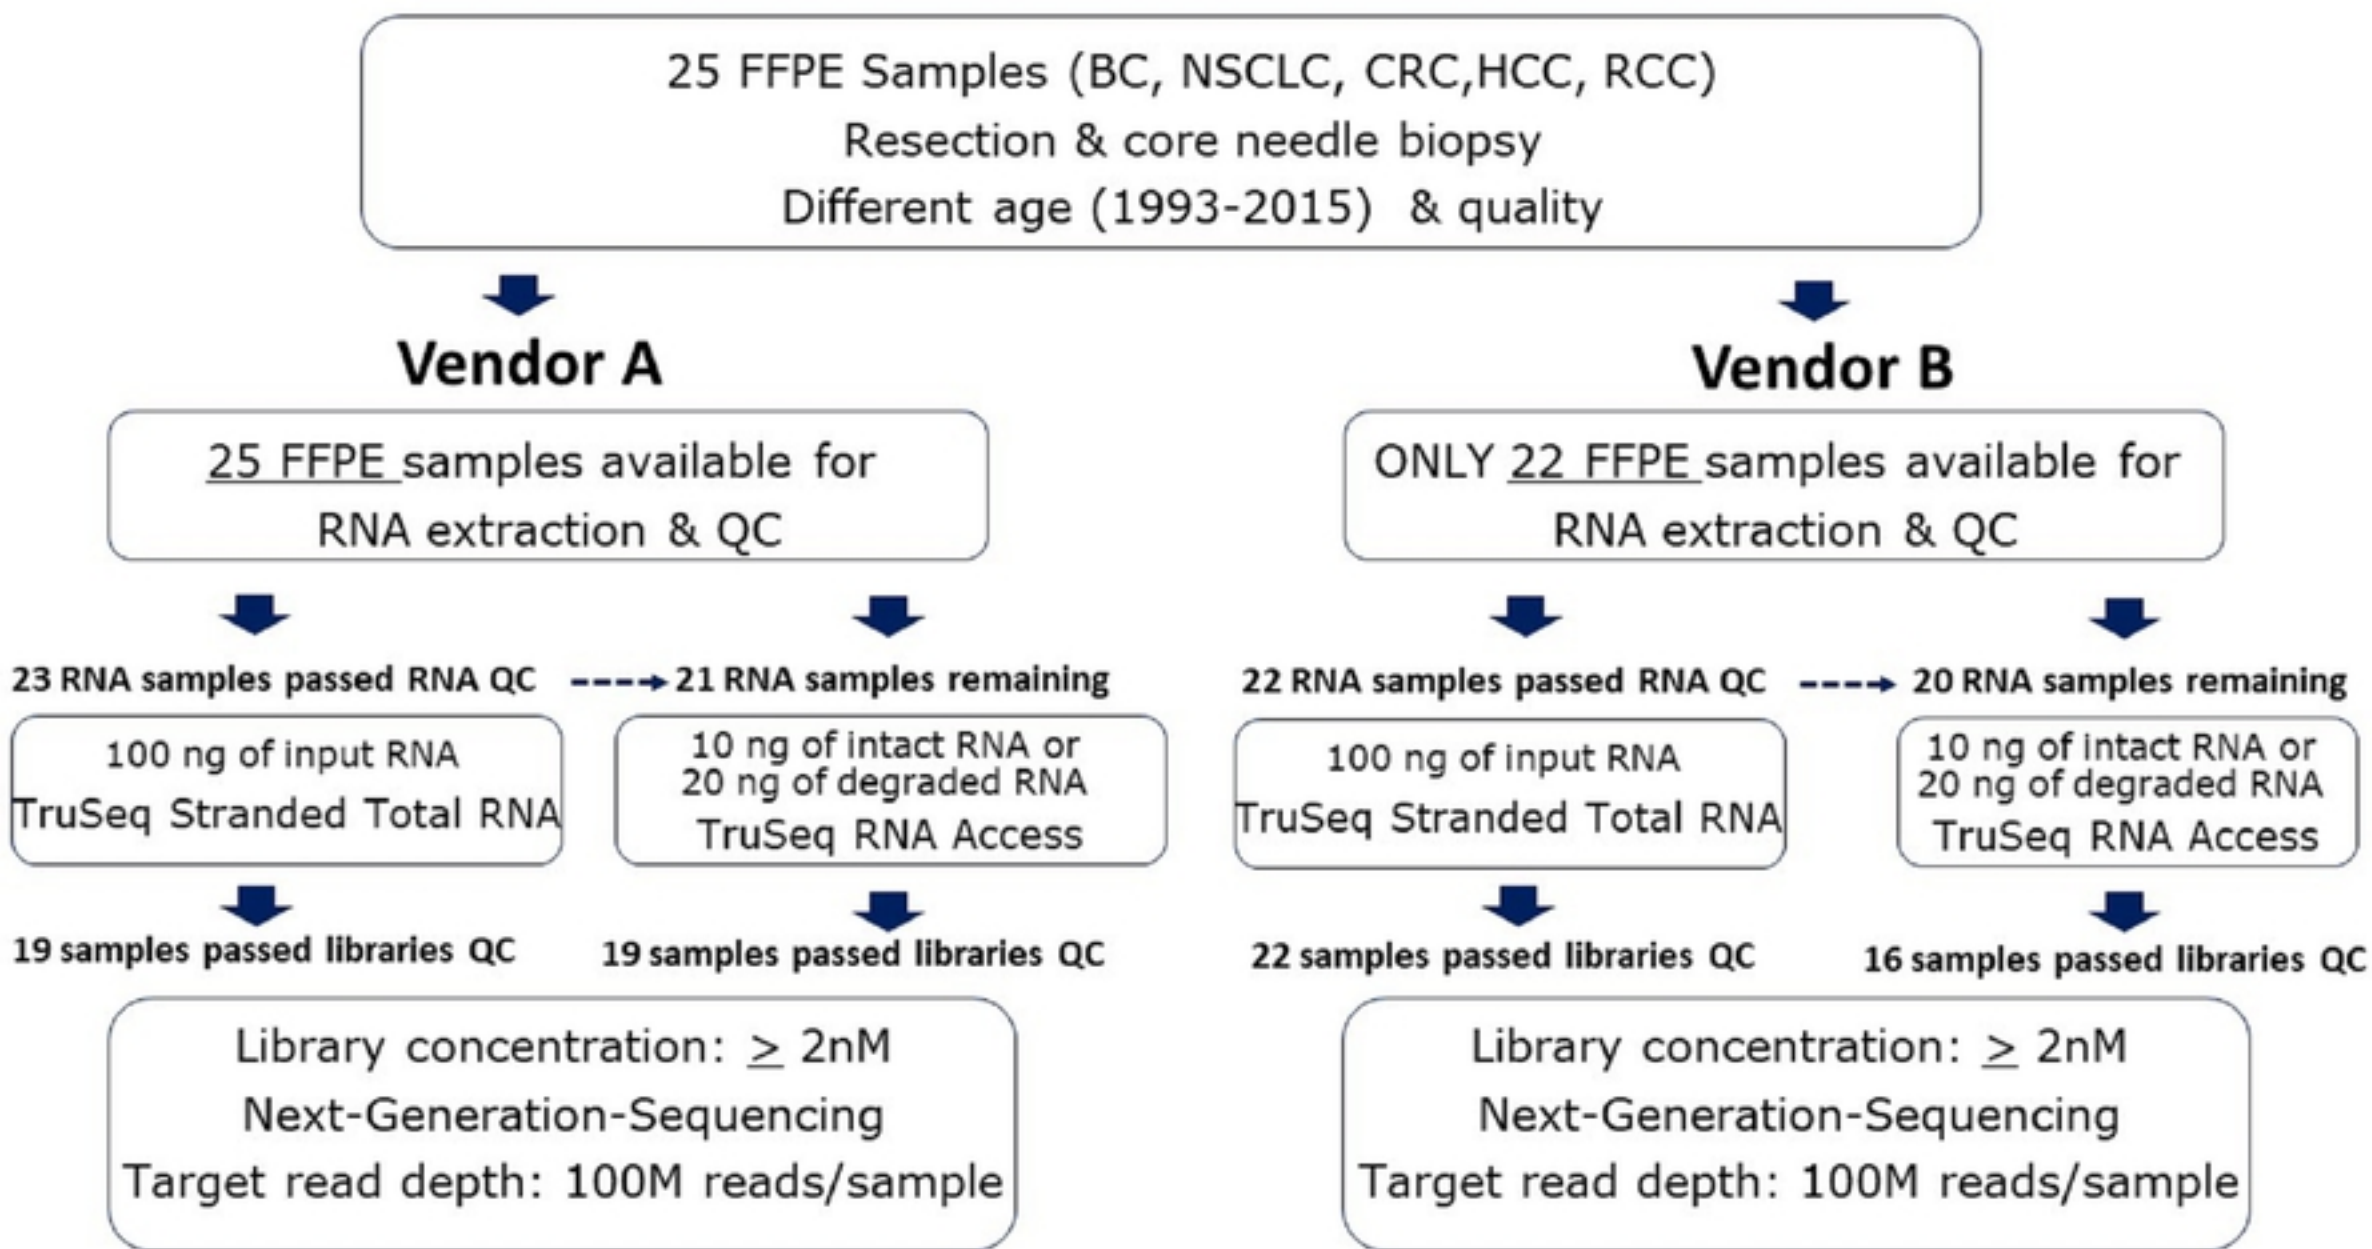

Figure 1



Vendor A vs B, TruSeq RNA Access,  
FFPE\_1582

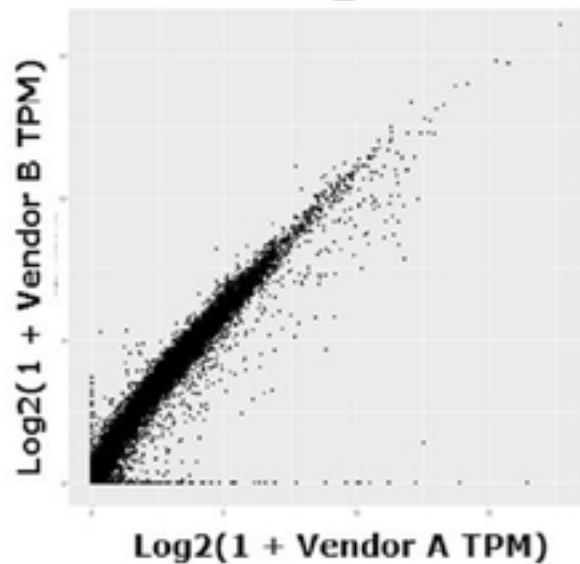

Vendor A vs B, TruSeq Stranded Total RNA,  
FFPE\_1582

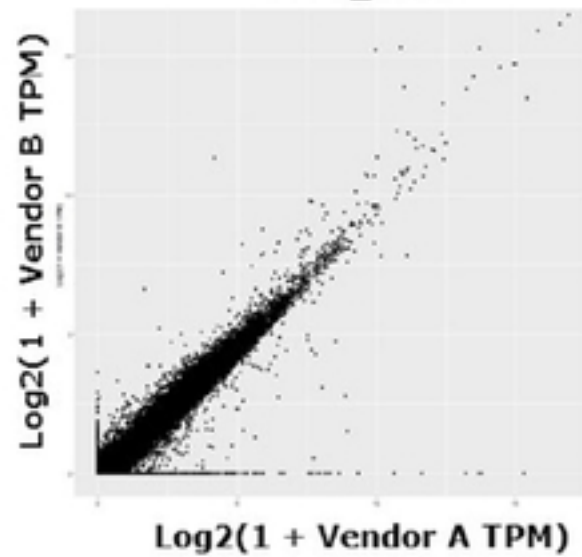

Vendor A vs B, TruSeq RNA Access,  
FFPE\_1579

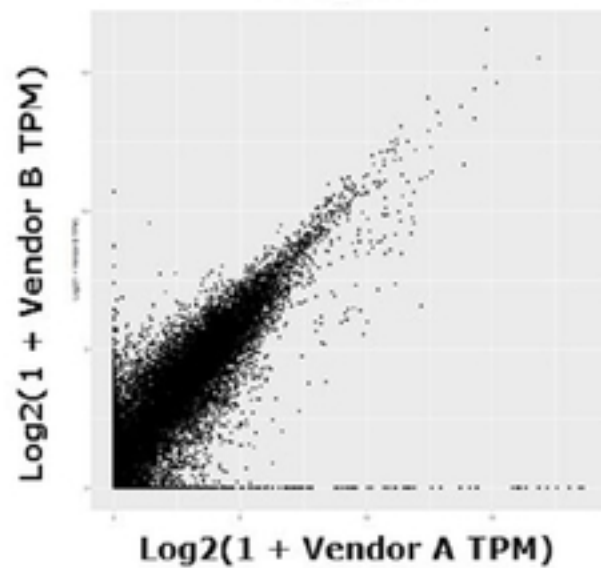

Vendor A vs B, TruSeq Stranded Total RNA,  
FFPE\_1579

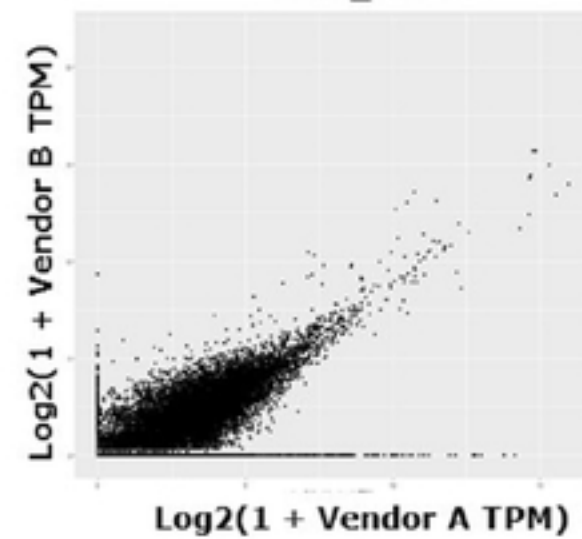

Figure 2

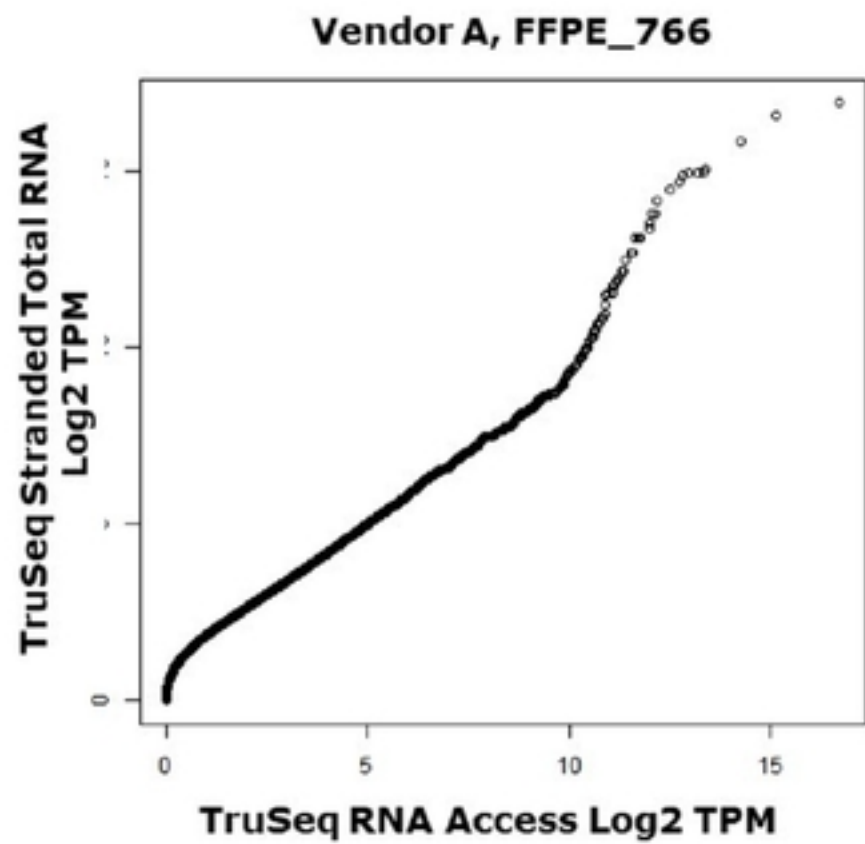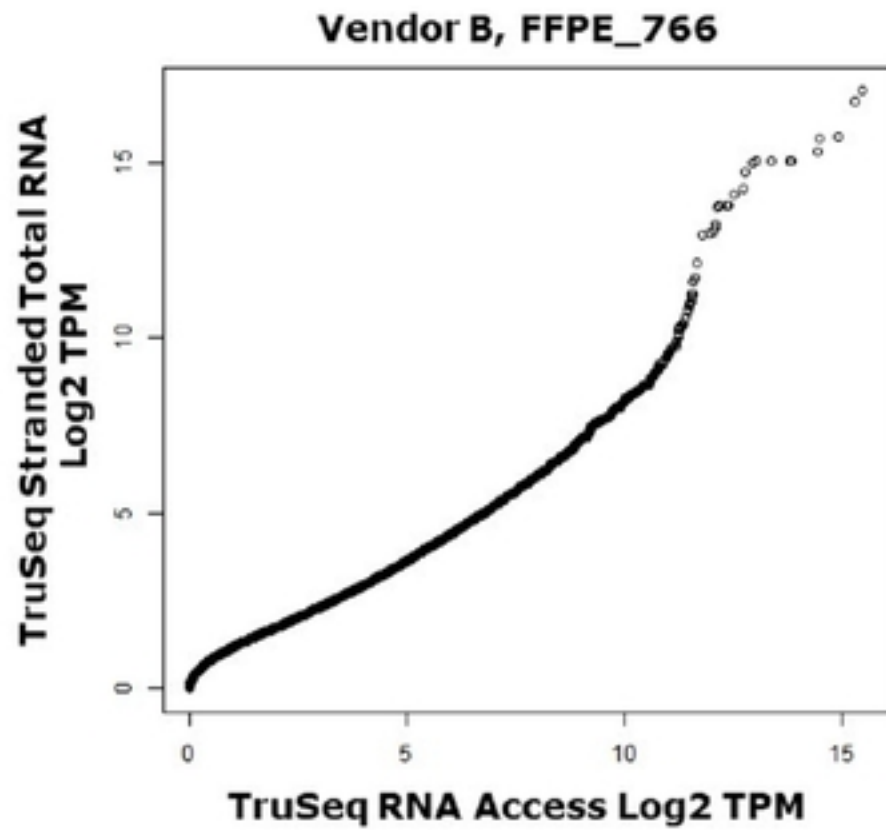

Figure 3

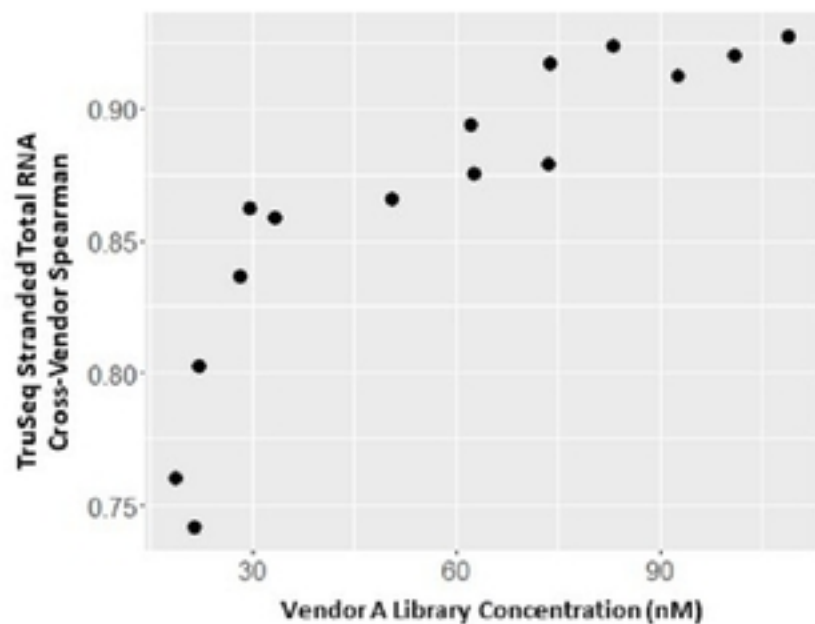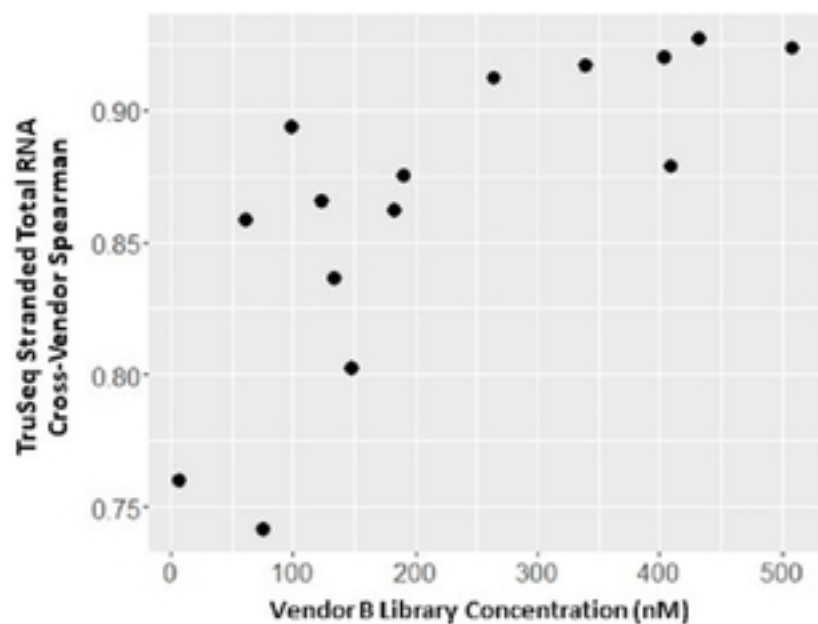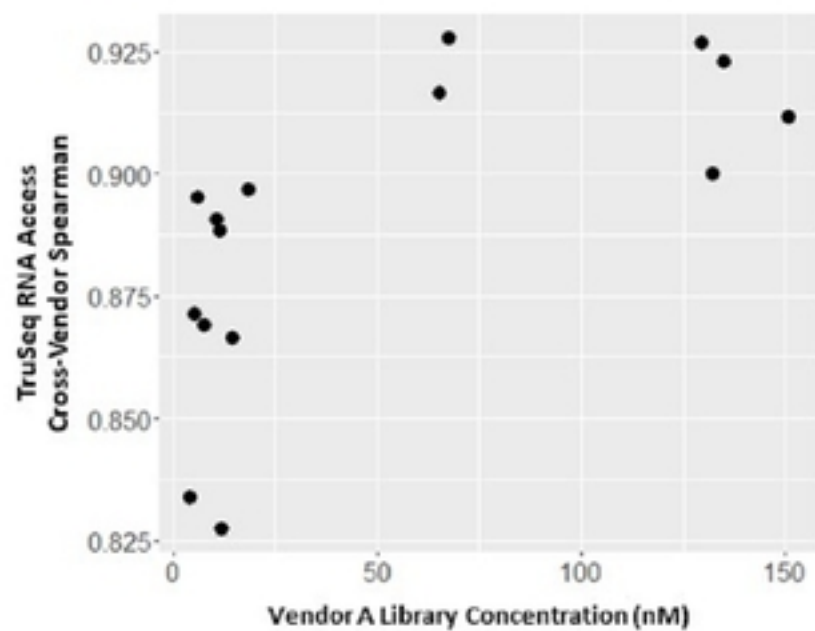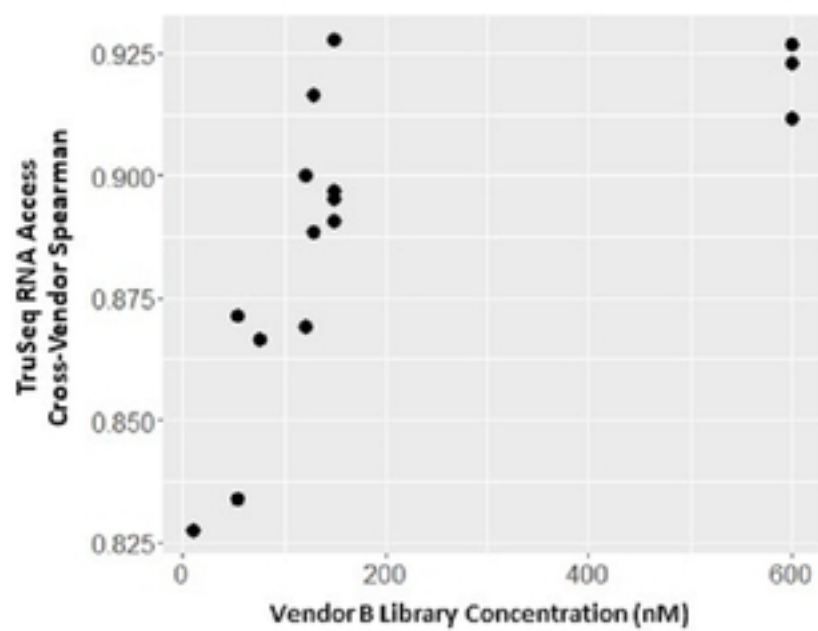

Figure 4
